# Supplementary material for: Novel Polyvinyl Alcohol/Starch Electrospun Fibers as a Strategy to Disperse Cellulose Nanocrystals into Poly(lactic acid)
Source: Polymers (Basel). 2017 Apr 7;9(4):117. doi: 10.3390/polym9040117 (PMC6432082; doi:10.3390/polym9040117)
Supplement: Supplementary file 1 [file polymers-09-00117-s001.pdf]

# Supplementary Materials: Novel Polyvinyl Alcohol/Starch Electrospun Fibers as a Strategy to Disperse Cellulose Nanocrystals into Poly(lactic acid)

Carol López de Dicastillo, Karina Roa, Luan Garrido, Alejandro Pereira and Maria Jose Galotto

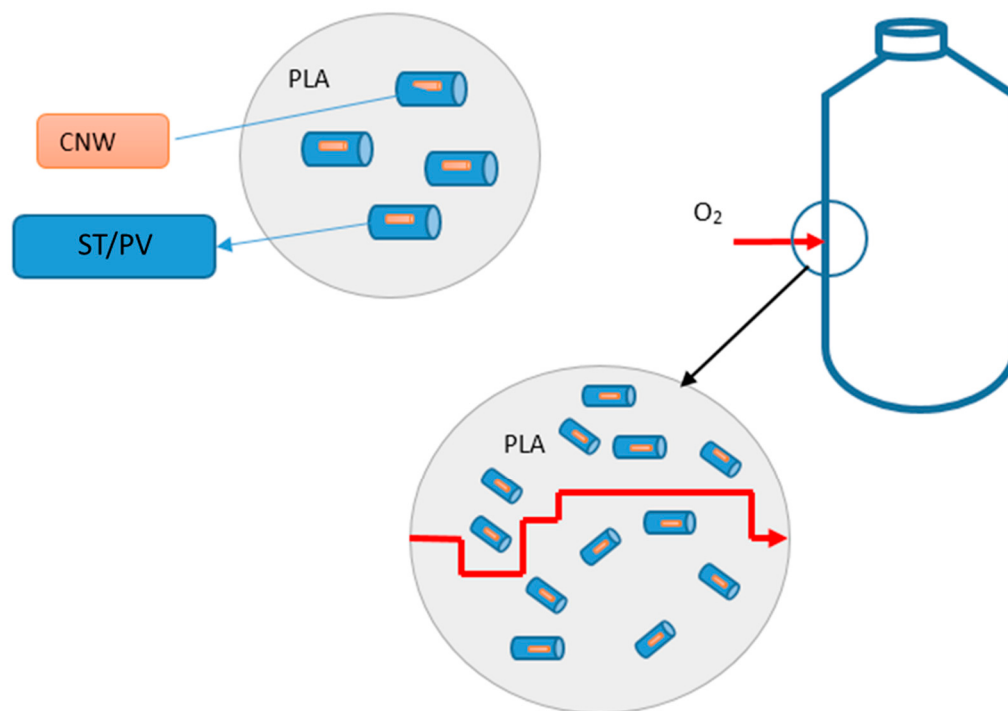

**Figure S1.** Schematic representation of the tortuous diffusion path generated by CNC containing fibers (PVST/CNC)<sub>f</sub> into PLA materials.
